# Supplementary material
Source: publisher figshare collection journal article supplement (https://sage.figshare.com/ndownloader/files/21645123)
Supplement: Supplementary file [file 21645123]

| Supplementary Table 1: Therapeutic interventions (n=201; 13%)                                                                                                                                                                                                                                                                                                                                                                                                                                    |                                                                  |                                                                                                |
|--------------------------------------------------------------------------------------------------------------------------------------------------------------------------------------------------------------------------------------------------------------------------------------------------------------------------------------------------------------------------------------------------------------------------------------------------------------------------------------------------|------------------------------------------------------------------|------------------------------------------------------------------------------------------------|
| Invasive physical procedures (n=149; 10%)                                                                                                                                                                                                                                                                                                                                                                                                                                                        |                                                                  |                                                                                                |
| Experimental interventions (n=59; 3.9%)                                                                                                                                                                                                                                                                                                                                                                                                                                                          | Medical device under investigation (n=17; 1.1%)                  | Study drug administration (n=73; 4.8%)                                                         |
| Nutritional interventions (n=31; 2.1%)<br>Transcranial magnetic or electric stimulation (n=10; 0.7%)<br>Surgical experiment (n=8; 0.5%)<br>Halotherapy (n=3; 0.2%)<br>Reduction in medication (n=2; 0.1%)<br>Altering the oxygen intake in emergency care (n=1; 0.1%)<br>Continuous positive airway pressure treatment combined with delaying a surgery (n=1; 0.1%)<br>Deep brain stimulation (n=1; 0.1%)<br>Exposure to theatrical smoke (n=1; 0.1%)<br>Fecal microbiota transplant (n=1; 0.1%) | Therapeutic device (n=10; 0.7%)<br>Diagnostic device (n=7; 0.5%) | Phase I (n=3; 0.2%)<br>Phase II (n=9; 0.6%)<br>Phase III (n=37; 2.5%)<br>Phase IV (n=24; 1.6%) |
| Non-invasive physical procedures (n=40; 2.6%)                                                                                                                                                                                                                                                                                                                                                                                                                                                    |                                                                  |                                                                                                |
| Experimental interventions (n=13; 0.9%)                                                                                                                                                                                                                                                                                                                                                                                                                                                          | Medical device under investigation (n=27; 1.8%)                  |                                                                                                |
| Physiological home excercise (n=8; 0.5%)<br>Physiological group excercise (n=4; 0.3%)<br>Taking participants to different natural areas (n=1; 0.1%)                                                                                                                                                                                                                                                                                                                                              | Diagnostic device (n=18; 1.2%)<br>Therapeutic device (n=9; 0.6%) |                                                                                                |
| Non-physical procedures (n=12; 0.8%)                                                                                                                                                                                                                                                                                                                                                                                                                                                             |                                                                  |                                                                                                |
| Experimental interventions (n=12; 0.8%)                                                                                                                                                                                                                                                                                                                                                                                                                                                          |                                                                  |                                                                                                |
| Psychological therapy in group (n=6; 0.4%)<br>Intervention through computerized or mobile phone application (n=4; 0.3%)<br>Psychological therapy given individually (n=2; 0.1%)                                                                                                                                                                                                                                                                                                                  |                                                                  |                                                                                                |
